# Supplementary material for: Get the News Out Loudly and Quickly: The Influence of the Media on Limiting Emerging Infectious Disease Outbreaks
Source: PubMed Central journal article supplement (PMC3753329; doi:10.1371/journal.pone.0071692), 2013-08-26
Supplement: pone.0071692.s004.pdf [file pone.0071692.s004.pdf]

**Table S2. Excess morbidity caused by leaving social distancing for varying time outside of isolation and varying  $R_0$  (by varying  $\beta$ );  $\kappa = 0.1$ .**

| $R_0$ | Time Outside (hours) | Media Influence Function 1 | Media Influence Function 2 | Media Influence Function 3 |
|-------|----------------------|----------------------------|----------------------------|----------------------------|
| 1.5   | 2                    | 1%                         | 1%                         | 1%                         |
|       | 4                    | 2%                         | 2%                         | 2%                         |
|       | 8                    | 4%                         | 3%                         | 5%                         |
| 2     | 2                    | 2%                         | 1%                         | 2%                         |
|       | 4                    | 3%                         | 2%                         | 4%                         |
|       | 8                    | 6%                         | 3%                         | 7%                         |
| 2.5   | 2                    | 1%                         | 1%                         | 2%                         |
|       | 4                    | 3%                         | 2%                         | 4%                         |
|       | 8                    | 6%                         | 4%                         | 8%                         |
| 3     | 2                    | 2%                         | 2%                         | 2%                         |
|       | 4                    | 3%                         | 3%                         | 5%                         |
|       | 8                    | 6%                         | 4%                         | 10%                        |
| 3.5   | 2                    | 2%                         | 1%                         | 3%                         |
|       | 4                    | 4%                         | 2%                         | 6%                         |
|       | 8                    | 6%                         | 3%                         | 12%                        |
